# Supplementary material for: Loss of retinoid X receptor gamma subunit impairs group 1 mGluR mediated electrophysiological responses and group 1 mGluR dependent behaviors
Source: PubMed Central journal article supplement (PMC7946894; doi:10.1038/s41598-021-84943-x), 2021-03-10
Supplement: 41598_2021_84943_MOESM1_ESM.pdf [file 41598_2021_84943_MOESM1_ESM.pdf]

**TITLE**

Loss of retinoid X receptor gamma subunit impairs group 1 mGluR mediated electrophysiological responses and group 1 mGluR dependent behaviors.

**AUTHORS**

Chirag Upreti<sup>1</sup>, Caitlin M. Woodruff<sup>3</sup>, Xiao-Lei Zhang<sup>1</sup>, Michael J. Yim<sup>3</sup>, Zhen-yu Zhou<sup>1,2</sup>, Andrew M. Pagano<sup>3</sup>, Dina S. Rehanian<sup>4,5</sup>, Deqi Yin<sup>3,6</sup>, Eric R. Kandel<sup>3,6,7,8</sup>, Patric K. Stanton<sup>1,2</sup>, Russell E. Nicholls<sup>4,5</sup>,

Department of Cell Biology and Anatomy<sup>1</sup>, Department of Neurology<sup>2</sup>, New York Medical College, Valhalla, NY 10595, USA.

Department of Neuroscience<sup>3</sup>, Howard Hughes Medical Institute<sup>6</sup>, Kavli Institute for Brain Science<sup>7</sup>, and Mortimer B. Zuckerman Mind Brain Behavior Institute<sup>8</sup>, Columbia University, 3227 Broadway, New York, NY 10027, USA.

Department of Pathology and Cell Biology<sup>4</sup>, Taub Institute for Research on Alzheimer's Disease and Aging Brain<sup>5</sup>, Columbia University, 630 West 168<sup>th</sup> Street, New York, NY 10032, USA.

**CORRESPONDING AUTHOR:**

Russell E. Nicholls, Ph.D.

Department of Pathology and Cell Biology, and  
The Taub Institute for Research on Alzheimer's Disease and the Aging Brain,  
Columbia University  
630 West 168<sup>th</sup> Street  
New York, NY 10032, USA

Phone: 646-379-1812

Email: rn95@columbia.edu

### **Supplemental Material:**

**Figure S1:** Sensitivity of LTD induced by 2Hz and 2 Hz paired-pulse stimulation to pharmacological inhibition of group 1 mGluR or NMDA receptors. A) Time courses of averaged initial fEPSP slopes  $\pm$  SEM at Schaffer collateral-CA1 synapses in hippocampal slices from wild-type mice prior to and after 2 Hz/10 min low frequency stimulation (black bar) in the presence of ACSF containing 10  $\mu$ M MCPG, 25  $\mu$ M D-APV or vehicle (gray bar). ANOVA of mean responses relative to baseline over the last 10 minutes of recording showed a significant effect of group ( $F(2,21) = 15.31$ ,  $p < 0.0001$ ). Dunnett's pairwise comparisons show a significant difference between the APV and vehicle-treated groups ( $p = 0.0002$ ), but not the MCPG and vehicle-treated groups ( $p = 0.7363$ ).  $N = 10$  vehicle, 8 APV, and 6 MCPG-treated slices. B) Time courses of averaged initial fEPSP slopes  $\pm$  SEM at Schaffer collateral-CA1 synapses in hippocampal slices from wild-type mice prior to and after 2 Hz paired-pulse stimulation (black bar) containing 10  $\mu$ M MCPG, 25  $\mu$ M D-APV or vehicle (gray bar). ANOVA of mean responses relative to baseline over the last 10 minutes of recording showed a significant effect of group ( $F(2,20) = 8.342$ ,  $p = 0.0023$ ). Dunnett's pairwise comparisons show a significant difference between the MCPG and vehicle-treated groups ( $p = 0.0011$ ), but not the APV and vehicle-treated groups ( $p = 0.2118$ ).  $N = 9$  vehicle, 8 APV, and 6 MCPG treated slices. Data were plotted using Prism (<https://www.graphpad.com/scientific-software/prism/>) and the figure assembled using Affinity Designer (<https://affinity.serif.com/en-gb/designer/>) software.

**Figure S2:** Representative signal-averaged traces before and after 2 Hz and DHPG-induced LTD in wild type and RXR $\gamma$  KO mice. A) Representative traces of fEPSP responses at baseline (black traces, average of -5 to 0 min before LFS) and average of 55-60 min after LTD (gray traces) elicited by 1200 action potentials at a frequency of 2HZ (LFS) in wild-type and RXR $\gamma$  KO slices from an experiment shown in Figure 1A. B) Representative traces of fEPSP responses at baseline (black traces, average of -5 to 0 min before LFS) and 55-60 min after LTD induction by 10 min bath application of DHPG (gray traces) by bath application of 30 $\mu$ M DHPG in wild-type and RXR $\gamma$  KO slices from experiment shown in Figure 1B. All traces are average of 10 consecutive sweeps. Data were plotted using Microsoft Excel 16.44 and the figure assembled using Affinity Designer (<https://affinity.serif.com/en-gb/designer/>) software.

**Figure S3:** Uncropped images of representative western blots shown in Fig. 3. A) Anti-mGluR1 immunoreactivity at the expected molecular weight as indicated by arrow. B) Corresponding anti-tubulin immunoreactivity detected on a separate channel for the blot shown in A. C) Anti-mGluR5 immunoreactivity at the expected molecular weight as indicated by arrow. D) Corresponding anti-tubulin immunoreactivity detected on a separate channel for the blot shown in C. Images were prepared using Image Studio (<https://www.licor.com/bio/image-studio/>), and the figure was assembled using Affinity Designer (<https://affinity.serif.com/en-gb/designer/>) software.

**Figure S4:** Animals lacking RXR $\gamma$  exhibit normal ambulatory activity in an open field and elevated plus maze. A-B) Plotted are average values  $\pm$  SEM for each 5 min interval of a 60 min, initial exposure to a novel open field environment. Average of 17 RXR $\gamma$  KO animals is shown in gray and 17 wild-type siblings in black. No significant differences were observed in: A) ambulatory distance traveled (RM-ANOVA:  $F(1,32)= 3.17$ ,  $P= 0.0845$ ) or B) resting time (RM-ANOVA:  $F(1,32)= 2.564$ ,  $P= 0.1191$ ). C) Average distance traveled  $\pm$  SEM during a 6 min of testing in an elevated plus maze for 18 RXR $\gamma$  KO animals (gray) and 18 wild-type siblings (black) revealed no significant differences between groups (WT:  $1507 \text{ cm} \pm 43.95$ ; KO:  $1597 \text{ cm} \pm 46.90$ ; T-test:  $t= 1.398$ ,  $P= 0.1713$ ). Data were plotted using Prism (<https://www.graphpad.com/scientific-software/prism/>) and the figure assembled using Affinity Designer (<https://affinity.serif.com/en-gb/designer/>) software.

**Figure S5:** Animals lacking RXR $\gamma$  exhibit normal swim speed and object exploration. A) Plot of average swimming speed  $\pm$  SEM over 4 trials per day during the visible platform (v1, v2), hidden platform (h1-5), and reversal phases (r1-5) of a Morris water maze task for 17 RXR $\gamma$  KO animals and 17 wild-type siblings revealed no differences between groups (2-way RM-ANOVA for genotype:  $F(1,64)= 0.1389$ ,  $P= 0.7106$  for visible;  $F(1,160)= 0.1274$ ,  $P= 0.7216$  for hidden;  $F(1,160)= 3.062$ ,  $P= 0.0821$  for reversal). B) Plot of average time spent exploring all objects  $\pm$  SEM during each 5 min trial of a non-spatial novel object recognition task shown in Fig 4D for 17 RXR $\gamma$  KO animals and 20 wild-type siblings revealed no differences between groups (2-way RM-ANOVA,  $F(1,35)= 0.2984$ ,  $P= 0.5884$  for genotype). Value for exploration time during empty arena test was generated by measuring the amount of time the animal's head was located

in the zones occupied by objects in subsequent trials. C) Plot of average time spent exploring all objects  $\pm$  SEM during each 5 min trial of a spatial version of a novel object recognition task shown in Fig 4E for 12 RXR $\gamma$  KO animals and 12 wild-type siblings revealed no differences between groups (2-way RM-ANOVA,  $F(1,22)= 0.3397$ ,  $P =0.5659$  for genotype). Value for exploration time during empty arena test was generated by measuring the amount of time the animal's head was located in the zones occupied by objects in subsequent trials. Data were plotted using Prism (<https://www.graphpad.com/scientific-software/prism/>) and the figure assembled using Affinity Designer (<https://affinity.serif.com/en-gb/designer/>) software.

**Figure S6:** Animals lacking RXR $\gamma$  exhibit normal startle responses, and normal activity in the Y-maze apparatus. A) Histogram of average startle amplitude  $\pm$  SEM for 22 RXR $\gamma$  KO and 21 wild-type siblings in response to 10 interspersed, post-habituation presentations of the 120 dB startle tone alone showed no significant difference between groups (T-test:  $t= 1.456$ ,  $P =0.1530$ ). B) Plot of average startle response time  $\pm$  SEM for 22 RXR $\gamma$  KO and 21 wild-type siblings revealed no significant differences between genotypes ( $F(1,41)= 0.3912$ ,  $P =0.5351$  for 2-way RM-ANOVA with genotype and prepulse amplitude as factors) in any of 3 types of prepulse inhibition trials: prepulse at 3 dB (pp3), 6 dB (pp6), or 12 dB (pp12) above background, or following presentation of the 120 dB startle tone alone (p120) (Fisher's LSD test KO vs. wt comparisons  $P =0.6460$ ,  $0.1662$ ,  $0.5265$ , and  $0.8501$  respectively). C, D) Histograms of the average distance traveled and average total arm entries during testing in a Y-maze revealed no significant differences between RXR $\gamma$  KO animals and their wild-type siblings (T-tests:  $t= 0.6262$ ,  $P = 0.9945$  for distance,  $t= 0.0069$ ,  $P = 0.5342$  for arm entries). (N = 19 RXR $\gamma$  KO and 30 wild-type siblings). Data were plotted using Prism (<https://www.graphpad.com/scientific-software/prism/>) and the figure assembled using Affinity Designer (<https://affinity.serif.com/en-gb/designer/>) software.

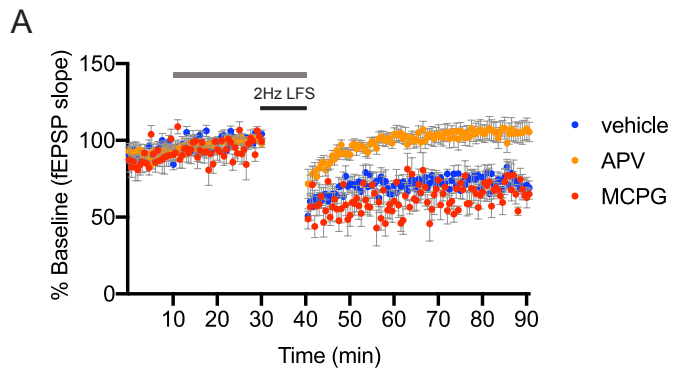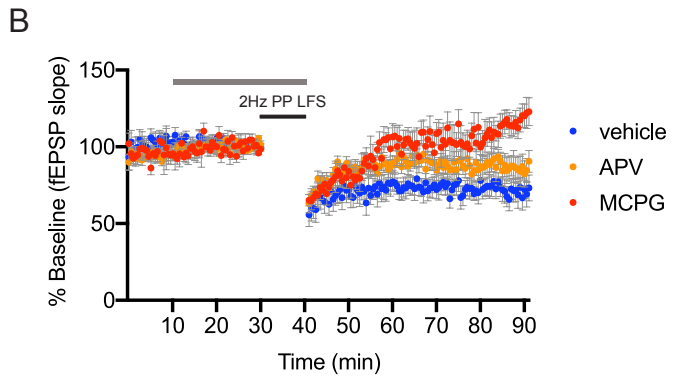

Fig S1

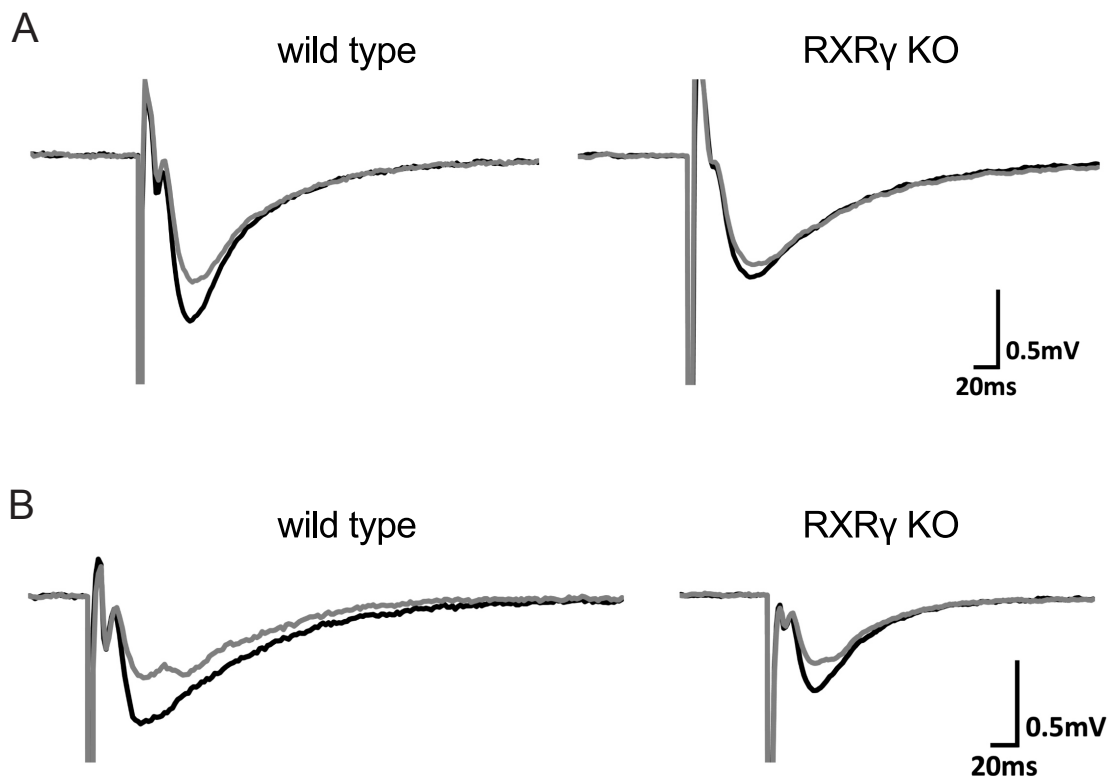

Fig S2

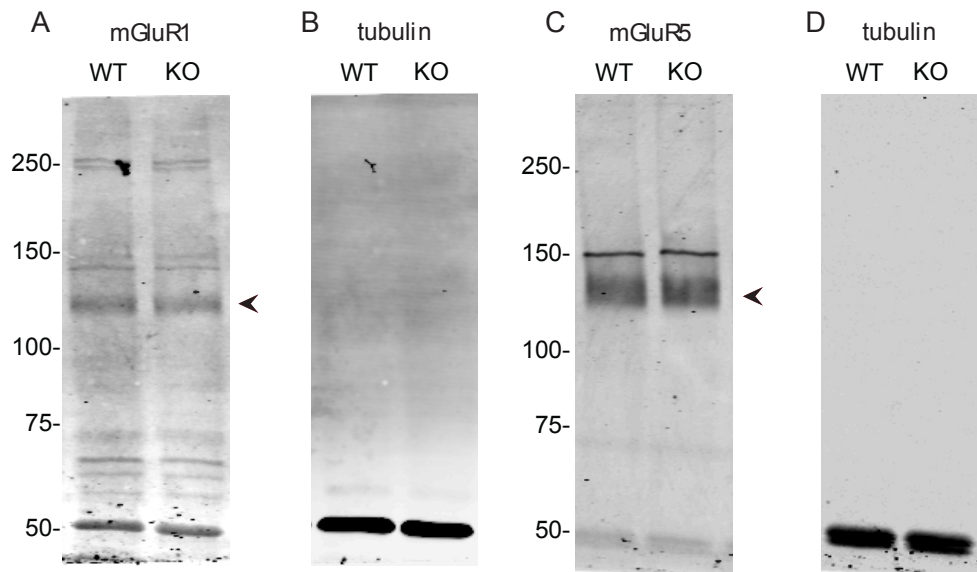

Fig S3

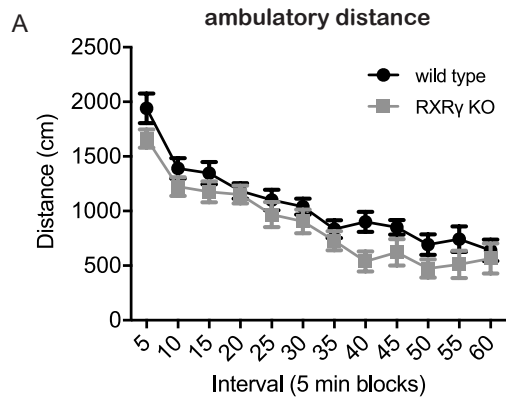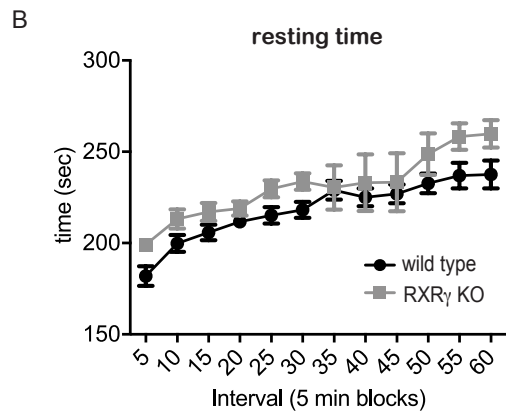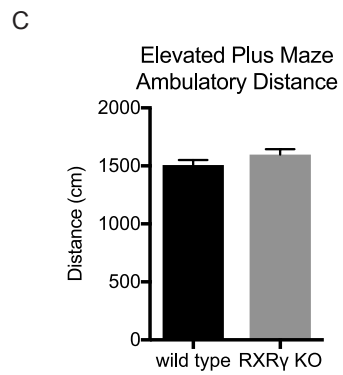

Fig S4



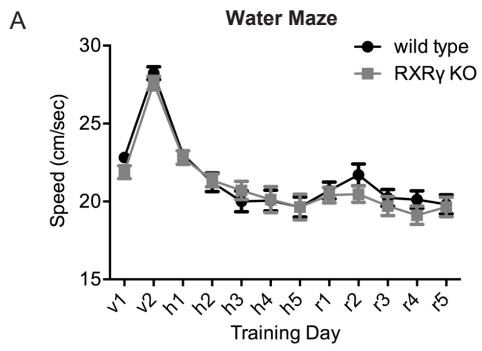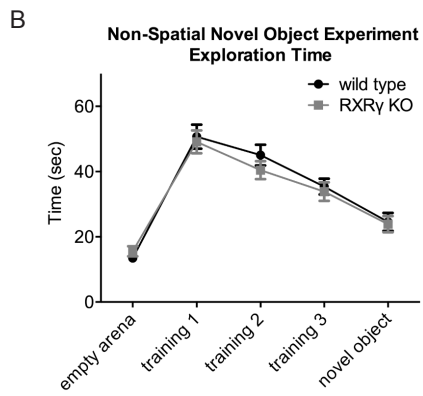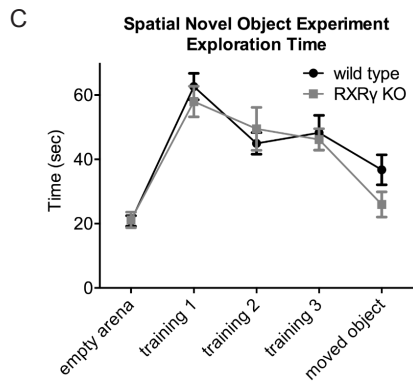

Fig S5

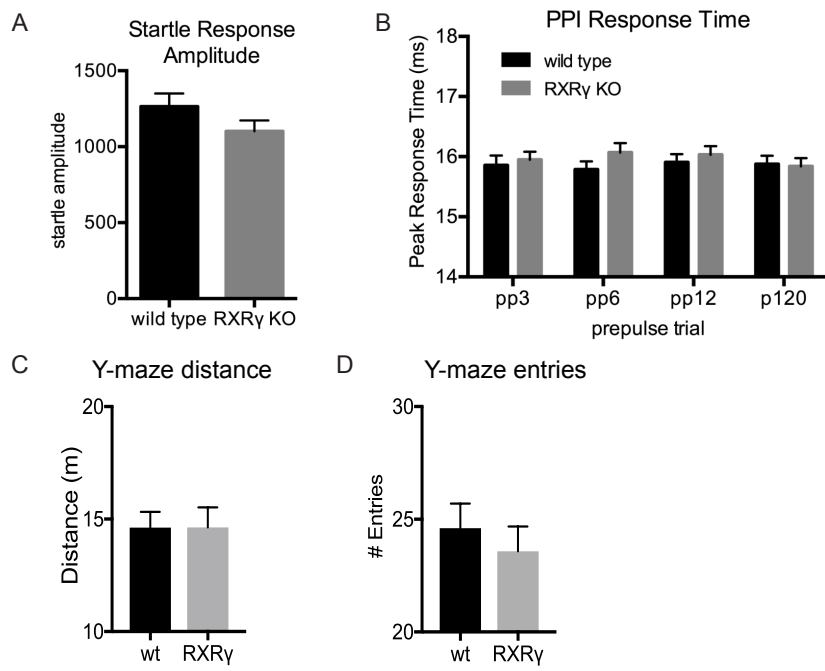

Fig S6
